1 **Original Article**

2 **Title Page:**

3 • Title: Development of a machine-learning model for therapeutic efficacy prediction of  
4 preoperative treatment for esophageal cancer using single nucleotide variants of  
5 autophagy-related genes

6

7 • Authors' names: Yutaka Miyawaki<sup>1</sup>, Masataka Hirasaki<sup>2,3\*</sup>, Yasuo Kamakura<sup>2</sup>, Tomonori  
8 Kawasaki<sup>4</sup>, Yasutaka Baba<sup>5</sup>, Tetsuya Sato<sup>6</sup>, Satoshi Yamasaki<sup>2</sup>, Hisayo Fukushima<sup>2</sup>, Kousuke  
9 Uranishi<sup>3</sup>, Yoshinori Makino<sup>2</sup>, Hiroshi Sato<sup>1</sup>, Tetsuya Hamaguchi<sup>2,7</sup>

10

11 • Authors' affiliations:

12 <sup>1</sup> Department of Gastroenterological Surgery, Saitama Medical University International  
13 Medical Center, 1397-1 Yamane, Hidaka, Saitama, 350-1298, Japan

14 <sup>2</sup> Department of Clinical Cancer Genomics, Saitama Medical University International Medical  
15 Center, 1397-1 Yamane, Hidaka, Saitama 350-1298, Japan

16 <sup>3</sup> Division of Biomedical Sciences, Research Center for Genomic Medicine, Saitama Medical

17 University, 1397-1 Yamane, Hidaka, Saitama 350-1298, Japan

18 <sup>4</sup>Department of Pathology, Saitama Medical University International Medical Center, 1397-1

19 Yamane, Hidaka, Saitama 350-1298, Japan

20 <sup>5</sup>Department of Diagnostic Radiology, Saitama Medical University International Medical Center,

21 1397-1 Yamane, Hidaka, Saitama 350-1298, Japan

22 <sup>6</sup> Biomedical Research Center, Faculty of Medicine, Saitama Medical University, 1397-1

23 Yamane, Hidaka, Saitama 350-1298, Japan

24 <sup>7</sup>Department of Medical Oncology, Gastroenterological Oncology, Saitama Medical University

25 International Medical Center, 1397-1 Yamane, Hidaka, Saitama 350-1298, Japan

26

27 Masataka Hirasaki is an equally contributed first author.

28

29 • Corresponding author: Masataka Hirasaki, PhD

30 Department of Clinical Cancer Genomics, Saitama Medical University International Medical

31 Center, 1397-1 Yamane, Hidaka, Saitama 350-1298, Japan

32 Tel.: +81-42-984-4111

33 Fax: +81-42-984-4741

34 Email: [hirasaki@saitama-med.ac.jp](mailto:hirasaki@saitama-med.ac.jp)

35

36 • Keywords: Biomarker; Esophageal Cancer; Machine Learning; Neoadjuvant Therapy;

37 Recurrence.

38

39 • Word count: 4814 words

40 Number of Figures: 4

41 Number of Tables: 4

42 Number of Supporting Information: 6

43

#### 44 **Abstract**

45 Neoadjuvant chemotherapy with cisplatin + 5-fluorouracil followed by radical surgery is the

46 standard treatment for stage II and III esophageal cancers. Although, a more potent regimen

47 comprising cisplatin + 5-fluorouracil with docetaxel, has shown superiority in overall survival

48 compared to the cisplatin + 5-fluorouracil regimen, it involves worsening of Grade 3 or higher  
49 adverse events due to docetaxel. Based on these reports, this study aimed to construct a  
50 prognostic system for cisplatin + 5-fluorouracil regimens, particularly for locally advanced  
51 cancers, to guide selection of neoadjuvant chemotherapy. Biopsy specimens from 82 patients  
52 who underwent a cisplatin + 5-fluorouracil regimen plus radical surgery at Saitama Medical  
53 University International Medical Center between May 2012 and June 2020 were analyzed.  
54 Variants in 56 autophagy- and esophageal cancer-related genes were identified using targeted  
55 enrichment sequencing. Overall, 13 single nucleotide variants, including eight  
56 non-synonymous group single nucleotide variants predicting recurrence were identified using  
57 Fisher's exact test with recurrence as a two-group event, which showed a significant difference  
58 ( $p < 0.05$ ). Additionally, machine learning was used to predict recurrence using 21 features,  
59 including eight patient backgrounds. The results showed that the Naive Bayes was highly  
60 reliable with an accuracy of 0.88 and Area Under the Curve of 0.9. Thus, we constructed a  
61 machine learning model to predict recurrence in patients with esophageal cancer treated with  
62 a cisplatin + 5-fluorouracil regimen. We believe that our results will provide useful guidance for  
63 the selection of neoadjuvant adjuvant chemotherapy, including the avoidance of docetaxel.

64 **Abbreviations:** CF: cisplatin + 5-fluorouracil; DCF: docetaxel + CF; OS: overall survival;  
65 RNA-seq: RNA sequencing; SNV: single nucleotide variant; AUC: area under the curve; ROC:  
66 Receiver Operating Characteristic; CIL: chemotherapy-induced leukopenia; RFS:  
67 recurrence-free survival; INDELS: insertions and deletions; ESCC: esophageal squamous cell  
68 carcinoma

69

## 70 **Introduction**

71 Esophageal cancer ranks seventh in terms of incidence and sixth in terms of overall mortality  
72 among all cancers<sup>1</sup>. The conventional standard treatment for stages II and III esophageal  
73 cancer in Japan is neoadjuvant chemotherapy with cisplatin + 5-fluorouracil (CF), followed by  
74 radical surgery<sup>2</sup>. According to previous reports, the 5-year survival rate for stage II cancers  
75 after neoadjuvant chemotherapy with the CF regimen is 69%. However, the 5-year survival  
76 rate for stage III cancer is poor at 52%, indicating that neoadjuvant chemotherapy with CF  
77 regimen has a limited effect in locally advanced cases<sup>3,4</sup>. Therefore, a more potent  
78 neoadjuvant chemotherapy regimen with docetaxel + CF (DCF) has attracted attention in  
79 recent years. A phase III trial (JCOG1109) comparing the superiority of neoadjuvant

80 chemotherapy with DCF and CF regimens demonstrated an overall survival (OS) advantage in  
81 the neoadjuvant DCF arm<sup>5</sup>. Based on these results, neoadjuvant DCF therapy became the  
82 standard treatment in Japan in February 2022<sup>6</sup>. However, the exacerbation of adverse events  
83 with docetaxel, specifically grade 3 or higher leukopenia (6.7–63.8%), neutropenia  
84 (23.4–85.2%), and hyponatremia (6.2– 26.0%), have also been reported simultaneously<sup>5</sup>. The  
85 high level of chemotherapy-related adverse events may potentially force a series of treatment  
86 interruptions, prevent the maintenance of ideal chemotherapy dose intensity, and make it  
87 difficult to complete treatment, including subsequent surgery. Chemotherapy-induced  
88 leukopenia (CIL) is also a known prognostic factor of chemotherapy in some malignancies,  
89 although it is not currently evident in esophageal cancer<sup>7–9</sup>. Based on these results, we believe  
90 that the establishment of prognostic markers, especially for CF regimens for cT3 resectable  
91 advanced esophageal cancers, will provide useful guidance in the selection of neoadjuvant  
92 chemotherapy, including the avoidance of docetaxel administration.

93

94 Autophagy is a highly regulated process of degradation and recycling of cellular components.

95 The most important feature of autophagy is that it degrades intracellular proteins and

96 organelles and recycles them as a new source of nutrients<sup>10</sup>. Recently, autophagy was shown  
97 to contribute to the acquisition of chemotherapy resistance in established cancers via  
98 intracellular recycling, provide a substrate for metabolism, and maintain a functional pool of  
99 mitochondria<sup>11</sup>. In patients with esophageal cancer receiving CF and DCF regimens, a high  
100 expression of PINK1, an initiator of mitophagy, was associated with poor prognosis, suggesting  
101 that PINK1-mediated mitophagy contributed to resistance to neoadjuvant therapy<sup>12</sup>. However,  
102 it was not established as a biomarker because high PINK1 protein expression did not correlate  
103 with the response to neoadjuvant chemotherapy in biopsy specimens obtained before  
104 neoadjuvant chemotherapy. In contrast, we previously reported that single-nucleotide variants  
105 in PINK1 may be biomarkers for non-recurrence in patients with colorectal cancer treated with  
106 postoperative adjuvant chemotherapy<sup>13</sup>.

107 This study aimed to construct a prognostic system for CF regimens, particularly for locally  
108 advanced cancers. The single nucleotide variants (SNVs) and insertions and deletions (INDELs)  
109 for autophagy- and esophageal cancer-related genes were identified in a sample of patients  
110 who received neoadjuvant chemotherapy with a CF regimen for esophageal squamous cell  
111 carcinoma (ESCC). The identified SNVs and INDELs were statistically examined, with recurrence

112 as an event between the two groups. Finally, a machine-learning model was constructed to  
113 predict recurrence by comprehensively considering 13 variants that were significantly  
114 correlated with recurrence. This provided a useful guidance for the selection of neoadjuvant  
115 chemotherapy, including avoiding docetaxel administration.

116

## 117 **Material and methods**

### 118 **Tissue samples**

119 Ninety-one patients with esophageal cancer who underwent a neoadjuvant CF regimen plus  
120 radical surgery at Saitama Medical University International Medical Center between May 2012  
121 and June 2020 were eligible. Of these, samples from 82 patients with sufficient DNA content  
122 were included in this study (Table 1). The location of tumor cells in the tissue specimen was  
123 determined both visually and microscopically by a pathologist using hematoxylin and  
124 eosin-stained (H&E) sections, which were taken from paraffin blocks of biopsy specimens of  
125 the esophageal cancer tissue.

126

127



128

129 **Target sequencing in clinical ESCC cases**

130 A total of 56 autophagy- and ESCC-related genes were selected for original target enrichment  
131 sequencing. The autophagy-related genes were largely the same as those previously reported;  
132 however, some genes were added or deleted<sup>13,14</sup>. The whole-genome analysis of 552  
133 esophageal squamous cell carcinoma cases identified cancer driver genes. Among them, 19  
134 genes with a high frequency of occurrence were selected<sup>15</sup>. The target regions were designed  
135 to enrich the exonic regions and exon–intron junctions of all 56 genes (Table S1). The mean  
136 percentile of the covered target regions was 99.57%.

137

138 **DNA extraction, library preparation, and data analysis for targeted capture sequencing**

139 Biopsy specimens from 82 patients were analyzed. The assessment and recovery of cancerous  
140 areas were performed using previously reported methods<sup>13,16</sup>. From the extracted DNA, a  
141 library of all the exon sequences of the 56 genes was prepared using the HaloPlex Target  
142 Enrichment kit (Agilent Technologies, Santa Clara, CA, USA), according to the manufacturer's  
143 instructions. The libraries were high-throughput sequenced on a NextSeq platform (Illumina,

144 San Diego, CA, USA) with 150 bp paired-end reads according to the manufacturer's protocol.

145 The data were analyzed using previously reported methods<sup>13</sup>. SNVs with multiple allelic

146 characteristics were excluded. A violin plot was generated using the R package

147 (<https://bioconductor.org/packages/release/-bioc/html/edgeR.html>).

148

#### 149 **Study design and statistical analysis**

150 A 2 × 2 cross-tabulation table was created with and without variants, and with and without

151 recurrence. A Fisher's exact test was performed using R based on the cross-tabulation table to

152 examine the association between gene variants and recurrence.

153 The variants with a preliminarily inferred association with postoperative recurrence were

154 examined for their associations with OS and recurrence-free survival (RFS). OS was defined as

155 the period from the date of surgery to the date of death. RFS was defined as the period from

156 the date of surgery to the date of first evidence of relapse. For patients who did not show

157 relapse or die, RFS or OS was censored at the last confirmed date of no recurrence. OS and RFS

158 were analyzed using the Kaplan–Meier method, and significance was determined by the

159 log-rank test using the open-source Python software package. The median follow-up period for

160 patients surviving without death was 51.2 (range: 7.0–107.8) months. Survival analysis was  
161 performed for 78 cases which had sufficient sample volume to allow the analysis of all variants  
162 that were candidates for prognostic factors. Univariate and Multivariate survival analyses were  
163 performed using a stratified Cox proportional hazard model. In the multivariate analyses,  
164 covariates were selected using backward elimination. All statistical tests were two-sided, and p  
165 < 0.05 was considered statistically significant.

166

#### 167 **RNA extraction, library preparation, and data analysis for RNA sequence**

168 Total RNA was isolated from formalin-fixed paraffin-embedded (FFPE) biopsy specimens (n =  
169 15) from patients with esophageal cancer were treated between 2012 and 2019. Libraries for  
170 RNA sequencing were prepared from total RNA as described previously<sup>17</sup>. Of the 15 specimens,  
171 eight and seven specimens showed non-recurrence and recurrence, respectively.

172 The resulting library was sequenced on an Illumina HiSeqX platform (2 × 150-bp read length).

173 Data analysis was based on previously reported methods with some modifications<sup>17</sup>.

174 Differentially Expressed Genes (DEGs) were defined as genes that showed a two-fold or

175 greater difference in the expression level of transcripts per million (TPM) values between the

176 recurrence and non-recurrence groups and a significant difference of  $p < 0.05$ . The significance  
177 estimate of the differences in gene expression, such as the p-value, was calculated using  
178 expected counts from the RSEM software package using edgeR package in R, and a volcano  
179 plot figure was generated using R. The DAVID database (<https://david.ncifcrf.gov/>) was used  
180 for Gene Ontology (GO) analyses. STRING  
181 ([https://stringdb.org/cgi/input?sessionId=b89PQA39oVO5&input\\_page\\_show\\_search=on](https://stringdb.org/cgi/input?sessionId=b89PQA39oVO5&input_page_show_search=on))  
182 analysis was used to identify protein-protein interaction networks associated with highly  
183 expressed transcripts. Raw counts from the gene expression data were normalized to log  
184 counts per million (log-CPM) and further transformed into z-scores. Principal component  
185 analysis (PCA) and heat map plots were created using R, based on log-CPM (z-score) values.

186

### 187 **Machine learning model construction**

188 The model development was performed using the Google Collab platform, and Pycaret was  
189 the first package used for machine learning, which required the installation of packages  
190 containing pandas, NumPy, warnings, and Pycaret (Moez A. PyCaret: an open-source, low-code  
191 machine learning library in Python. <https://www.pycaret.org>). Feature sets from eight

192 different patient backgrounds and 21 different patient backgrounds + SNVs were separately  
193 entered into Pycaret. Pycaret divided each set into training (70%) and independent test  
194 cohorts (30%) to build a recurrence prediction model. Each feature set was trained on 15  
195 machine learning models, and the stability of the models was evaluated by performing 10-fold  
196 cross-validation of the performance of each model and the genomic features that contributed  
197 the most to automatic generation in the training cohort. The most accurate models were  
198 subjected to hyperparameter tuning, and the tuned models were assembled using the  
199 blending method. The missing values in the SNVs were filled using Pandas df. fillna  
200 (data.mean()).

201

## 202 **Results**

### 203 **Original target enrichment sequencing**

204 Biopsy specimens from patients with esophageal cancer undergoing radical surgery after  
205 treatment with the CF regimen were used to identify SNVs and INDELS for 56 genes related to  
206 autophagy and esophageal cancer using targeted enrichment sequencing to construct a  
207 prognostic system for the CF regimen. Between May 2012 and June 2020, 91 patients

208 underwent the CF regimen + radical surgery at Saitama Medical University International  
209 Medical Center, of which 82 patients were eligible for the study after the required amount of  
210 DNA was obtained. The clinical characteristics of the 82 patients are presented in Table 1.  
211 Among the 82 patients, 45 experienced recurrence, representing a 55% recurrence rate.  
212 Next-generation sequencing yielded a median of 2,252,009 reads per sample (range:  
213 714,042–6,247,424 reads per sample). Among the designed target bases, 87.1% (range:  
214 40.2–98.4% per sample) had at least a 15-fold coverage, with a mean coverage of 660 fold  
215 (range: 156.11–1,963 fold) per nucleotide in the coding region of the target gene (Fig 1A-B).

216

#### 217 **Breakdown of SNVs and INDELS**

218 The next-generation sequencing data analysis only reported the presence of AltSeq (Alt, any  
219 other allele found at that locus); therefore, if there were no sequence reads, AltSeq was  
220 considered absent. Variant filtering based on criteria such as depth of coverage, variant allele  
221 frequency, and AltSeq counts reduces false-positive results and ensures confidence in the  
222 detected variants. By setting thresholds for "Depth of coverage  $\geq 15$ , Variant allele frequency  $\geq$   
223 5%, and AltSeq  $\geq 2$ ", we aimed to ensure that detected variants were supported by enough

224 sequencing reads and were present at a significant level to be considered genuine (Fig 1C). The  
225 original target enrichment sequencing for cases with neoadjuvant chemotherapy showed that  
226 a total of 12,562 SNVs or INDELS were detected within the target region (Fig 1D). Among these  
227 variants, 7,962 were non-synonymous SNVs, indicating that they resulted in amino acid  
228 changes in the protein sequences. Additionally, 88 frameshift deletions and 17 frameshift  
229 insertions were detected, indicating that these alterations caused a shift in the reading frame  
230 of the gene. The SNVs associated with stop-gain variants were identified at 596 locations (Fig  
231 1D). These variants resulted in premature termination of protein synthesis.

232

### 233 **Variants correlated with recurrence**

234 We examined the associations among SNVs, INDELS, and recurrence. The variants found in a  
235 sample of 82 patients with recurrence were treated as binary events and subjected to Fisher  
236 exact tests. Thirteen variants were significantly different ( $p < 0.05$ ). Among these variants,  
237 eight were non-synonymous SNVs, four were synonymous SNVs, and one was a splicing-site  
238 variant (Table 2).

239

240

241

242 **Survival analysis of 13 candidate SNVs in RFS and OS**

243 The RFS was analyzed for 13 identified variants. The results indicated significant differences in

244 RFS for six of these variants (Fig 2A-B and Table S2). The OS analysis was also performed for

245 the 13 identified variants, with significant differences observed for two variants, ATG2A

246 p.R478C ( $p < 0.005$ ) and ULK2 splice sites ( $p=0.05$ ) (Fig 2C-D).

247 The variants in ATG2A p.R478C, extracted as candidate prognostic factors, showed an

248 association with RFS and OS in univariate analysis ( $p=0.025$  and  $0.002$ , respectively). The

249 variants in the ULK2 splice site were associated with RFS but not with OS ( $p=0.016$  and  $0.054$ ,

250 respectively). Additionally, multivariate Cox regression analysis revealed that the presence of

251 variants in ATG2A\_R478C or the absence of variants in ULK2\_1442-2G>T ( $p=0.046$ , hazard

252 ratio=2.076) and conventional open thoracotomy ( $p=0.018$ , hazard ratio=2.096) were

253 independent prognostic factors for RFS. Likewise, multivariate Cox regression analysis of OS

254 revealed that the presence of variants in ATG2A\_R478C or the absence of variants in



255 ULK2\_1442-2G>T (p=0.029, hazard ratio=2.764) and clinical lymph node metastasis (p=0.040,  
256 hazard ratio=2.604) were independent prognostic factors for OS (Tables 3–4).

257

### 258 **Correlation between pathogenic/likely pathogenic SNVs and recurrence rate**

259 The SNVs and INDELS classified as pathogenic or likely pathogenic mutations in ClinVar were  
260 found at 212 locations in 22 genes, including 17 esophageal cancer-related genes. Among  
261 these variants, 11 were frameshift deletions, 15 were splicing variants, 95 were  
262 non-synonymous SNVs, and 87 were stop-gain variants. Fisher's exact test was conducted for  
263 each gene to assess its association with recurrence; however, none of the genes showed  
264 statistically significant differences (Fig 1S). Moreover, pathogenic/likely pathogenic variants  
265 were observed in 81 of the 82 analyzed specimens. This suggests that while these variants  
266 were prevalent among the patient samples, they did not appear to significantly influence  
267 recurrence or prognosis.

268

### 269 **Machine learning model to predict recurrence**

270 In this study, 13 SNVs were identified as candidate predictors of recurrence after neoadjuvant  
271 chemotherapy with the CF regimen for esophageal cancer. However, some specimens had  
272 multiple types of SNVs, thus, the question remained as to which SNVs should be trusted for  
273 prediction (Fig 2SA). Therefore, we investigated the construction of a recurrence prediction  
274 model using machine learning, considering 21 factors, including the SNVs found in this study  
275 and patient background (Fig 2SB).

276 Fifteen algorithms were trained using the Pycaret classification module, and 21 features,  
277 including patient background and SNV, to construct a model with recurrence as the correct  
278 answer. The accuracy level of the entire model was compared based on the accuracy value,  
279 and the results showed the highest value of 0.8467 for Naive Bayes (Table S3). Furthermore,  
280 when tune\_model was used for accuracy, the value became 0.88, which was defined as the  
281 final\_model (Fig 3A). When eight types of patient backgrounds were used as features, the  
282 accuracy was 0.5633 in Naïve Bayes (Fig 3A). Additionally, other evaluation metrics such as  
283 Recall, Precision (Prec.), F1 Score, Kappa, and Matthews Correlation Coefficient (MCC) also  
284 demonstrated the superiority of the model using all 21 factors, including SNVs (Fig 3A). These

285 results showed that incorporating SNVs along with patient background information  
286 significantly improved the predictive performance of the model.

287 A Receiver Operating Characteristic (ROC) curve for Naive Bayes was generated, showing an  
288 Area Under the Curve (AUC) value of 0.9 for both class 0 (no recurrence) and class 1  
289 (recurrence) (Fig 3B). This AUC value indicated that this model had an excellent discriminative  
290 ability to distinguish between possible recurrences.

291 The confusion matrix was one of the representations used in machine learning to evaluate the  
292 performance of classification models. From the confusion table, the true positive value was  
293 seven, which was higher than the false negative value of four (Fig 3C). Furthermore, it is  
294 noteworthy that the number of true negatives was 14 and the number of false positives was 0  
295 (Fig 3C). These results suggested that the Naive Bayes classification model had high  
296 performance in terms of both sensitivity (true positive rate) and specificity (true negative rate)  
297 in predicting recurrence in patients with esophageal cancer.

298

299 **Comparison of the expressions of coding RNAs between recurrence and non-recurrence**  
300 **groups**

301 This study demonstrated several predictive systems for ineffective CF regimens. Therefore, to  
302 propose a selective treatment for the poor response group, we performed a comprehensive  
303 expression analysis to understand the biological characteristics of the poor response group. In  
304 the analysis of differential gene expression between recurrence and non-recurrence  
305 specimens among 19,972 coding genes, 187 genes were found to have higher expression levels  
306 in the recurrence group compared to the non-recurrence group, whereas 128 genes showed  
307 lower expression levels in the recurrence group compared to the non-recurrence group based  
308 on the criteria of fold change  $\geq 2$  and p-value  $< 0.05$  (Fig 4A).

309 GO analysis using the DAVID database revealed the enrichment of specific biological processes  
310 associated with highly expressed genes in the recurrence and recurrence-free groups. In the  
311 recurrence group, 21 genes with high expression were enriched in processes related to the  
312 "G-protein coupled receptor (GPCR) signaling pathway" (Fig 4B). In contrast, in the  
313 recurrence-free group, eight and seven genes with high expression were enriched in processes  
314 related to "keratinization" and "epidermis development," respectively (Fig 4C). These genes,  
315 especially those contributing to the "GPCR signaling pathway," may be potential additional  
316 therapeutic targets for patients with poor response to the CF regimen.

317

318 **Possibility of predicting recurrence by analysis of gene set expression levels**

319 Recurrence was predicted by analyzing the expression levels of 34 genes associated with the  
320 three GO terms. Initially, the expression levels of the 34 genes among the samples were  
321 visualized using a heat map to gain insight into the differences and similarities between the  
322 samples. Hierarchical cluster analysis was used to group the samples based on similarities in  
323 their gene expression profiles. The results showed that except for the 44 ESC samples, the  
324 samples predominantly clustered into two main groups: recurrence and non-recurrence (Fig  
325 4D). Principal component analysis (PCA) was performed on the expression data of 34 genes.  
326 Plotting the data in the first two principal components showed that, excluding the 44 ESC  
327 samples as in the hierarchical cluster analysis, recurrence could effectively distinguish  
328 non-recurrence samples in the first principal component (Fig 4E).

329 The expression levels of 56 genes related to autophagy and esophageal cancer were also  
330 examined. Only CDKN2A showed a significant difference at  $p > 0.02$ , with an approximately  
331 7.6-fold increase in expression in the recurrent group compared to that in the non-recurrence  
332 group (Fig 4A). Clustering and PCA were performed on 37 autophagy-related genes (Fig 3S

333 A-B); however, the results did not clearly distinguish non-recurrence from relapse. This  
334 suggested that the 56 genes associated with autophagy and esophageal cancer were not  
335 compatible with the prediction of recurrence by expression level analysis.

336

### 337 **Discussion**

338 Although neoadjuvant chemotherapy with DCF therapy, a three-drug combination regimen for  
339 resectable locally advanced esophageal cancer, is expected to prolong the prognosis of  
340 postoperative survival, the high incidence of adverse events, such as myelosuppression, is a  
341 major clinical issue. CF, a conventional neoadjuvant chemotherapy regimen, showed superior  
342 tolerability in terms of drug toxicity, although its prolonged postoperative prognostic effect  
343 was less satisfactory than that of DCF therapy. We identified various autophagy- and  
344 esophageal cancer-related gene variants as biomarkers that could predict the efficacy of CF  
345 therapy prior to treatment. Eventually, we constructed a machine learning model that was  
346 highly predictive of postoperative recurrence based on 21 factors consisting of clinical factors  
347 and SNVs. We also established a highly heterogeneous treatment selection system using the  
348 machine-learning model.

349 In surgical specimens from patients with esophageal cancer receiving neoadjuvant  
350 chemotherapy, a high expression of PINK1 protein, an initiator of mitophagy, correlated with  
351 poor response to neoadjuvant chemotherapy with CF or DCF regimen; however, this  
352 correlation was not observed in biopsy specimens taken prior to chemotherapy. Thus, PINK1  
353 protein expression is not considered a predictive biomarker for response to neoadjuvant  
354 chemotherapy with CF or DCF regimen in patients with esophageal cancer. In contrast to  
355 PINK1 protein expression, the 13 SNVs identified in this study were prognostic predictors of  
356 neoadjuvant chemotherapy with the CF regimen in patients with esophageal cancer.  
357 Specifically, SNVs such as p.R478C in ATG2A and in the splice site of ULK2 were found to be  
358 significant. These SNVs are reported for the first time as prognostic predictors of esophageal  
359 cancer. However, SNVs in PINK1 (c.1018G>A and c.1562A>C), which were previously suggested  
360 to be prognostic factors for 5-FU-based adjuvant chemotherapy in colon cancer, showed no  
361 significance in ESCC. Conversely, SNVs identified in esophageal cancer did not show significant  
362 differences in colorectal cancer. The difference in the prognosis-related SNVs between  
363 colorectal cancer and ESCC suggests that the genetic characteristics affecting treatment  
364 response and outcome may differ significantly between different cancer types. This

365 underscores the importance of considering organ-specific genetic profiles when developing  
366 personalized medical approaches.

367

368 ATG2A plays an important role in autophagosome formation, an early step in autophagy, and  
369 promotes the lipid translocation required for autophagosome membrane expansion<sup>18</sup>. ATG2A

370 promotes colony formation and migration in glioblastoma cell lines by activating autophagy.

371 This suggests that it is involved in cancer progression and therapeutic response<sup>19</sup>. ATG2A

372 p.C478 minor variant was found to be significantly associated with worse RFS and OS

373 compared to p.R478 major variant. This suggests that the p.C478 variant may contribute to a

374 poor response to CF regimens by activating autophagy. In silico analysis with PolyPhen2, the

375 p.C478 variant was "probably damaging," with a score of 1.000, indicating that the high score

376 was functionally significant. Further biochemical characterization is needed to better

377 understand the functional impact and role of p.C478 mutation in ATG2A during neoadjuvant

378 chemotherapy for esophageal cancer. Such characterization efforts may pave the way for the

379 development of targeted therapies aimed at modulating the activity of this mutant and for the

380 identification of biomarkers to guide treatment decisions, especially in relation to CF regimens.



381 Thirteen variants showed significant differences in predicting recurrence after treatment with  
382 CF regimens for esophageal cancer. Therefore, we constructed a machine learning method to  
383 predict recurrence using 21 features, including eight patient backgrounds and 13 SNVs, which  
384 showed high accuracy (0.88) and AUC (0.9).

385

386 However, this study had some limitations. First, the differences in the importance of the  
387 features of the 13 SNVs were examined; however, the Naïve Bayes algorithm was difficult to  
388 compute directly and has not been shown. Second, in this study, the hyperparameters were  
389 optimized collectively using the `tune_model` function; however, it was also possible to  
390 effectively tune the individual parameters. Third, the number of samples was limited because  
391 the test sample was 25, and the cohort was single. In contrast, PCA and hierarchical clustering  
392 analyses of 34 genes identified as DEGs in the expression analysis of recurrent and  
393 non-recurrent groups suggested the possibility of predicting recurrence. In the confusion  
394 matrix shown in Figure 3C, there were four cases of non-recurrence in which recurrence was  
395 expected. In the future, we would like to consider improving the decision rate when SNVs  
396 analysis and pathological image results are added to machine learning features.

397

398 Prognostic prediction of CF regimens by SNVs showed that the ATG2A p.R478C ( $p < 0.005$ ) and  
399 ULK2 splice site ( $p=0.05$ ) variants were candidates. Furthermore, when machine learning was  
400 performed, considering information from the 13 SNVs as features, the AUC=0.9 was high. As  
401 the purpose of the RNA-seq analysis in this study was to determine the biological  
402 characteristics of the recurrent group, the number of samples was limited to 15. In the future,  
403 the number of specimens should be 82, the same as in the SNVs analysis, to examine whether  
404 prognosis can be predicted by expression analysis. We would also like to consider improving  
405 the decision rate when the results of the expression analysis are added to the machine  
406 learning features.

407 Genes contributing to the GPCR signaling pathway were enriched in the recurrent group. They  
408 are located on the cell membrane and transduce extracellular signals to produce key  
409 physiological effects<sup>20</sup>. Activated by external signals through coupling to different G proteins or  
410 arrestins, GPCRs elicit a cyclic adenosine 3,5-monophosphate (cAMP) response, calcium  
411 mobilization, and phosphorylation of extracellular signal-regulated protein kinases  
412  $1/2(pERK1/2)$ <sup>21,22</sup>. As one of the most successful therapeutic target families, GPCRs have

413 undergone a transition from random ligand screening to knowledge-driven drug design<sup>21</sup>. Of  
414 the 826 human GPCRs, approximately 350 were regarded as druggable and 165 were validated  
415 drug targets<sup>21</sup>. GNG4, which was highly expressed in the recurrent group, is a member of the  
416 G-protein  $\gamma$  family, which typically transduces signals from upstream GPCRs<sup>23</sup>. GNG4 is  
417 upregulated in primary gastric cancer and liver metastatic lesions. High expression of GNG4 in  
418 primary cancer tissues are associated with shorter OS and likelihood of liver recurrence.  
419 Functional assays revealed that GNG4 promoted cancer cell proliferation, cell cycle, and  
420 adhesion<sup>24</sup>. Tumor formation in GNG4-knockout cells was moderately reduced in a  
421 subcutaneous mouse model and strikingly attenuated in a mouse model of liver metastasis<sup>24</sup>.  
422 Genes contributing to the GPCR signaling pathway that were highly expressed in the recurrent  
423 group, particularly GNG4, are potential drug targets.  
424 The other limitations were that this study was a small-sample single-center study, and future  
425 validation with a larger cohort is needed. Second, the median follow-up period of surviving  
426 patients was relatively short, and further follow-up studies are required to evaluate the  
427 long-term results of this study. Third, the biochemical functions of the variants identified in  
428 this study are unknown.

429 Nonetheless, we believe that our model for predicting the efficacy of CF therapy is significant  
430 because it is expected to avoid excessive drug toxicity caused by DCF therapy while  
431 simultaneously providing a non-inferior therapeutic effect. The therapeutic effect of standard  
432 DCF therapy can be expected even in cases in which CF therapy is deemed ineffective. In  
433 future studies, it will be necessary to examine whether our model for predicting the efficacy of  
434 CF therapy is relevant to predict the efficacy of DCF therapy, particularly if patients who are  
435 expected to receive ineffective CF therapy can be rescued by DCF therapy.

436 In conclusion, candidate genes were identified to predict the prognosis of CF regimens, and a  
437 machine learning model was constructed to further predict recurrence. We believe that this  
438 information will be useful for the selection of neoadjuvant chemotherapy, including the  
439 avoidance of docetaxel. The avoidance of unnecessary drugs may provide useful guidance not  
440 only for patients, but also for health economics.

441

## 442 **Acknowledgments**

443 We thank the staff of the Division of Analytical Science, Hidaka Branch of the Biomedical  
444 Research Center, Saitama Medical University, for providing research equipment and offering

445 important advice. We would like to thank Editage ([www.editage.jp](http://www.editage.jp)) for English language

446 editing.

447

448

449

450

#### 451 **Availability of data and materials**

452 The data are not publicly available because of privacy and ethical restrictions. Access to the

453 data and calculation methods can be obtained from the corresponding author upon request

454 via email ([hirasaki@saitama-med.ac.jp](mailto:hirasaki@saitama-med.ac.jp)).

455

#### 456 **Disclosure:**

#### 457 **Funding Information**

458 This work was supported by the Hidaka Project (4-D-1-04) and Takeda Science Foundation

459 (MH). MH is the recipient of a grant from the Japan Society for the Promotion of Science (JSPS)

460 KAKENHI (grant number: 21K06825).

461

462 **Conflict of Interest**

463 All authors declared that there are no conflicts of interest.

464

465

466

467 **Ethics Statement**

468 - **Approval of the research protocol by an Institutional Reviewer Board.** This study adhered to

469 the ethical standards of the Declaration of Helsinki and its subsequent amendments. This study

470 was approved by the Institutional Review Board of the Saitama Medical University

471 International Medical Center (2022-113 and 2024-055).

472 - **Informed Consent.** The requirement for informed consent was waived by the Institutional

473 Review Board of Saitama Medical University International Medical Center in view of the

474 retrospective nature of this study.

475 - **Registry and the Registration No. of the study/trial.** *N/A.*

476 - **Animal Studies.** *N/A.*

477

## 478 **Author Contributions**

479 YM collected patient data, performed statistical analysis, and prepared the manuscript. MH  
480 performed the chromosomal DNA and total RNA extraction, analyzed and interpreted the data  
481 from the next-generation sequencer, and prepared the manuscript. YK prepared sections of  
482 FFPE samples. TK determined the tumor area. YB is an advisor for machine learning. TS and YS  
483 are advisors for bioinformatics. HF, KU, YM, HS and TH designed and supervised the study and  
484 revised the manuscript. All the authors have read and approved the final version of the  
485 manuscript.

## 486 **References**

- 487 1. Sung H, Ferlay J, Siegel RL, et al. Global Cancer Statistics 2020: GLOBOCAN Estimates of  
488 Incidence and Mortality Worldwide for 36 Cancers in 185 Countries. *CA Cancer J Clin.*  
489 2021;71(3):209–249. doi: 10.3322/CAAC.21660.
- 490 2. Kitagawa Y, Uno T, Oyama T, et al. Esophageal cancer practice guidelines 2017 edited by  
491 the Japan Esophageal Society: part 1. *Esophagus.* 2019;16(1):1–24. doi:  
492 10.1007/s10388-018-0641-9.
- 493 3. Yokota T, Ando N, Igaki H, et al. Prognostic Factors in Patients Receiving Neoadjuvant  
494 5-Fluorouracil plus Cisplatin for Advanced Esophageal Cancer (JCOG9907). *Oncology.*  
495 2015;89(3):143–151. doi: 10.1159/000381065.
- 496 4. Ando N, Kato H, Igaki H, et al. A randomized trial comparing postoperative adjuvant  
497 chemotherapy with cisplatin and 5-fluorouracil versus preoperative chemotherapy for

- 498 localized advanced squamous cell carcinoma of the thoracic esophagus (JCOG9907). *Ann*  
499 *Surg Oncol.* 2012;19(1):68–74. doi: 10.1245/S10434-011-2049-9/FIGURES/5.
- 500 5. Kato K, Ito Y, Daiko H, et al. A randomized controlled phase III trial comparing two  
501 chemotherapy regimen and chemoradiotherapy regimen as neoadjuvant treatment for  
502 locally advanced esophageal cancer, JCOG1109 NExT study.  
503 [https://doi.org/10.1200/JCO.2022.40.4\\_SUPPL.238](https://doi.org/10.1200/JCO.2022.40.4_SUPPL.238) 2022;40(4\_suppl):238–238. doi:  
504 10.1200/JCO.2022.40.4\_SUPPL.238.
- 505 6. Kitagawa Y, Ishihara R, Ishikawa H, et al. Esophageal cancer practice guidelines 2022  
506 edited by the Japan esophageal society: part 1. *Esophagus.* 2023;20(3):343–372. doi:  
507 10.1007/s10388-023-00993-2.
- 508 7. Shitara K, Matsuo K, Takahari D, et al. Neutropenia as a prognostic factor in advanced  
509 gastric cancer patients undergoing second-line chemotherapy with weekly paclitaxel.  
510 *Ann Oncol.* 2010;21(12):2403–2409. doi: 10.1093/ANNONC/MDQ248.
- 511 8. Hara H, Mizusawa Junki, Hironaka Shuichi, et al. Influence of preoperative  
512 chemotherapy-induced leukopenia on survival in patients with esophageal squamous  
513 cell carcinoma: exploratory analysis of JCOG9907. *Esophagus.* 2021;18:41–48. doi:  
514 10.1007/s10388-020-00752-7.
- 515 9. Miyoshi N, Yano M, Takachi K, et al. Myelotoxicity of preoperative chemoradiotherapy is  
516 a significant determinant of poor prognosis in patients with T4 esophageal cancer. *J Surg*  
517 *Oncol.* 2009;99(5):302–306. doi: 10.1002/JSO.21235.
- 518 10. Devenport SN, Shah YM. Functions and Implications of Autophagy in Colon Cancer. *Cells.*  
519 2019;8(11)1349. doi: 10.3390/CELLS8111349.
- 520 11. Wang Y, Liu HH, Cao YT, et al. The Role of Mitochondrial Dynamics and Mitophagy in  
521 Carcinogenesis, Metastasis and Therapy. *Front Cell Dev Biol.* 2020;8:413. doi:  
522 10.3389/FCELL.2020.00413.
- 523 12. Yamashita K, Miyata H, Makino T, et al. High Expression of the Mitophagy-Related  
524 Protein Pink1 is Associated with a Poor Response to Chemotherapy and a Poor Prognosis  
525 for Patients Treated with Neoadjuvant Chemotherapy for Esophageal Squamous Cell  
526 Carcinoma. *Ann Surg Oncol.* 2017;24(13):4025–4032. doi: 10.1245/S10434-017-6096-8.
- 527 13. Mihara Y, Hirasaki M, Horita Y, et al. PTEN-induced kinase 1 gene single-nucleotide  
528 variants as biomarkers in adjuvant chemotherapy for colorectal cancer: a retrospective  
529 study. *BMC Gastroenterol.* 2023;23(1):339. doi: 10.1186/s12876-023-02975-1.



- 530 14. Klionsky DJ, Abdelmohsen K, Abe A, et al. Guidelines for the use and interpretation of  
531 assays for monitoring autophagy (3rd edition). *Autophagy*. 2016;12(1):1–222. doi:  
532 10.1080/15548627.2015.1100356.
- 533 15. Moody S, Senkin S, Islam SMA, et al. Mutational signatures in esophageal squamous cell  
534 carcinoma from eight countries with varying incidence. *Nat Genet*.  
535 2021;53(11):1553–1563. doi: 10.1038/s41588-021-00928-6.
- 536 16. Inoue H, Hirasaki M, Kogashiwa Y, et al. Predicting the radiosensitivity of HPV-negative  
537 oropharyngeal squamous cell carcinoma using miR-130b. *Acta Otolaryngol*.  
538 2021;141(6):640–645. doi: 10.1080/00016489.2021.1897160.
- 539 17. Ichinose Y, Hasebe T, Hirasaki M, et al. Vimentin-positive invasive breast carcinoma of  
540 no special type: A breast carcinoma with lethal biological characteristics. *Pathol Int*.  
541 2023;73(9):413–433. doi: 10.1111/pin.13350.
- 542 18. van Vliet AR, Chiduzza GN, Maslen SL, et al. ATG9A and ATG2A form a heteromeric  
543 complex essential for autophagosome formation. *Mol Cell*. 2022;82(22):4324–4339.e8.  
544 doi: 10.1016/j.molcel.2022.10.017.
- 545 19. Chu F, Wu P, Mu M, et al. MGCG regulates glioblastoma tumorigenicity via  
546 hnRNPK/ATG2A and promotes autophagy. *Cell Death Dis*. 2023;14(7):443. doi:  
547 10.1038/s41419-023-05959-x.
- 548 20. Insel PA, Sriram K, Gorr MW, et al. GPCRomics: An Approach to Discover GPCR Drug  
549 Targets. *Trends Pharmacol Sci*. 2019;40(6):378–387. doi: 10.1016/J.TIPS.2019.04.001.
- 550 21. Yang D, Zhou Q, Labroska V, et al. G protein-coupled receptors: structure-and  
551 function-based drug discovery. *Signal Transduct Target Ther*. 2021;6(1):7. doi:  
552 10.1038/s41392-020-00435-w.
- 553 22. Wootten D, Christopoulos A, Marti-Solano M, et al. Mechanisms of signalling and biased  
554 agonism in G protein-coupled receptors. *Nat Rev Mol Cell Biol*. 2018;19(10):638–653.  
555 doi: 10.1038/s41580-018-0049-3.
- 556 23. Kleuss C, Scherübl H, Hescheler J, et al. Selectivity in Signal Transduction Determined by  
557  $\gamma$  Subunits of Heterotrimeric G Proteins. *Science*. 1993;259(5096):832–834. doi:  
558 10.1126/SCIENCE.8094261.
- 559 24. Tanaka H, Kanda M, Miwa T, et al. ARTICLE G-protein subunit gamma-4 expression has  
560 potential for detection, prediction and therapeutic targeting in liver metastasis of gastric  
561 cancer. *Br J Cancer* 2021;125:220–228; doi: 10.1038/s41416-021-01366-1.

562 **Figure legends**

563 **Fig 1. Results of the original target enrichment sequencing in our ESCC clinical cases**

564 (A) The violin plot depicts the distribution of the coverage ratio for each of the 82 multiplexed  
565 samples. Percentage of regions had a depth of coverage greater than 15x . (B) The violin plot  
566 depicts the distribution of the mean depth for each of the 82 multiplexed samples. (C) Variant  
567 filtering thresholds (AltSeq: Alt, any other allele found at that locus). (D) The number of SNVs  
568 or INDELs identified by the original target enrichment sequencing is shown. The classification  
569 was performed by variant type.

570

571 **Fig 2. Relationship between variants of ATG2A p.R478C and ULK2 splice-site and ESCC**  
572 **prognosis with CF neoadjuvant chemotherapy**

573 Relapse-free survival with (A) ATG2A p.R478C or (B) ULK2 1442-1 G> T, respectively. Overall  
574 survival with or without (C) ATG2A p.R478C or (D) ULK2 1442-1 G> T, respectively.

575

576 **Fig 3. Machine learning model to predict recurrence**

577 (A) An indicator to evaluate the prediction of recurrence by Naive Bayes with patient  
578 background or patient background + SNVs (single nucleotide variants) as features. (Prec.:  
579 Precision). (B) The ROC (receiver operating characteristic) curve for fine-tuned Naive Bayes.  
580 Class 0 implies non-recurrence. Class 1 implies recurrence. (C) Confusion matrix for fine-tuned  
581 Naive Bayes.

582

583 **Fig 4. Expression analysis between recurrence and non-recurrence groups**

584 (A) Volcano plot of differentially expressed genes between recurrence (n=7) and  
585 non-recurrence (n=8) groups. Summary of biological processes in gene ontology analysis  
586 (GO-BP) of genes with elevated expression in recurrence (B) and non-recurrence (C) groups.  
587 (D) Heatmap and hierarchical cluster analysis performed on 34 genes. Blue above specimen  
588 number means no recurrence, red means recurrence. The color coding next to the gene means  
589 that the gene is included in the G-protein coupled receptor signaling pathway (red),  
590 keratinization (blue), and epidermis development (yellow). (E) Principal component analysis  
591 performed on 34 genes. Red specimen name indicates recurrence group, gray specimen name  
592 indicates non-recurrence group.

593

## 594 **Supporting information**

### 595 **Fig. S1. ClinVar-based pathogenic SNVs**

596 Samples with variants defined as pathogenic/likely pathogenic by ClinVar are shown in red.

597 Fisher's exact test was performed for each gene that was determined to be pathogenic/likely

598 pathogenic by ClinVar. Path: Pathogenic/Likely Pathogenic variant. RefSeq: allele in the

599 reference genome.

### 600 **Fig. S2. Variant distribution of specimens and elements of machine learning**

601 (A) Samples with AltSeq variants are shown in red. Undetected samples with sequence reads

602 that do not meet the criteria are shown in yellow. (B) Patient background only is circled in

603 yellow. Patient background with additional SNVs information is circled in blue.

604

### 605 **Fig. S3. Expression analysis of autophagy-related genes**

606 (A) Heatmap and hierarchical cluster analysis performed on 37 autophagy-related genes. Blue

607 above specimen number indicates no-recurrence, red indicates recurrence. (B) Principal

608 component analysis performed on 37 genes. Red specimen name indicates recurrence group,

609 gray specimen name indicates no-recurrence group.

610

611 **Tables**

612 **Table S1.** Targeted genes in clinical cases of esophageal cancer

613 **Table S2.** Overall survival (OS) and recurrence-free survival (RFS) analysis of 13 identified

614 variants

615 **Table S3.** Results of the Pycaret classification module when patient background + SNVs is the

616 feature and recurrence is the correct answer

617

(Fig 1)

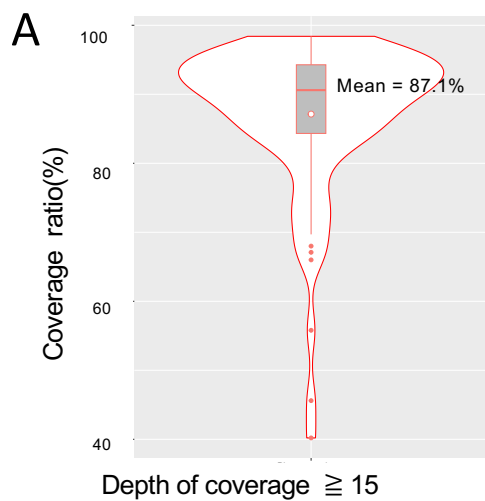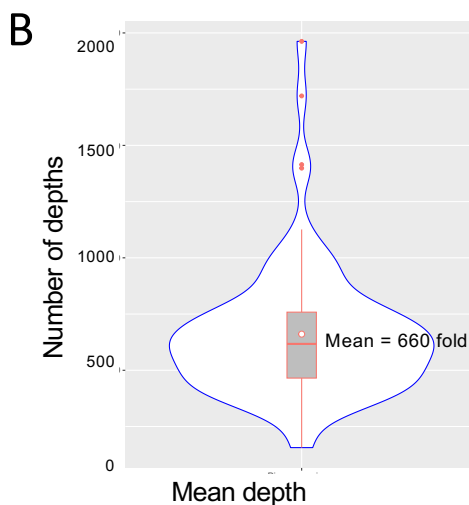

**C**

Variant filtering

- Depth of coverage  $\geq 15$
- Variant allele frequency  $\geq 5\%$
- ALTseq  $\geq 2$

**D**

|                            | Number of Variants |
|----------------------------|--------------------|
| frameshift deletion        | 88                 |
| frameshift insertion       | 17                 |
| splicing                   | 171                |
| exonic;splicing            | 222                |
| nonsynonymous SNV          | 7962               |
| startloss                  | 8                  |
| stopgain                   | 596                |
| stoploss                   | 7                  |
| nonframeshift deletion     | 19                 |
| nonframeshift insertion    | 4                  |
| nonframeshift substitution | 17                 |
| synonymous SNV             | 3451               |

(Fig 2)

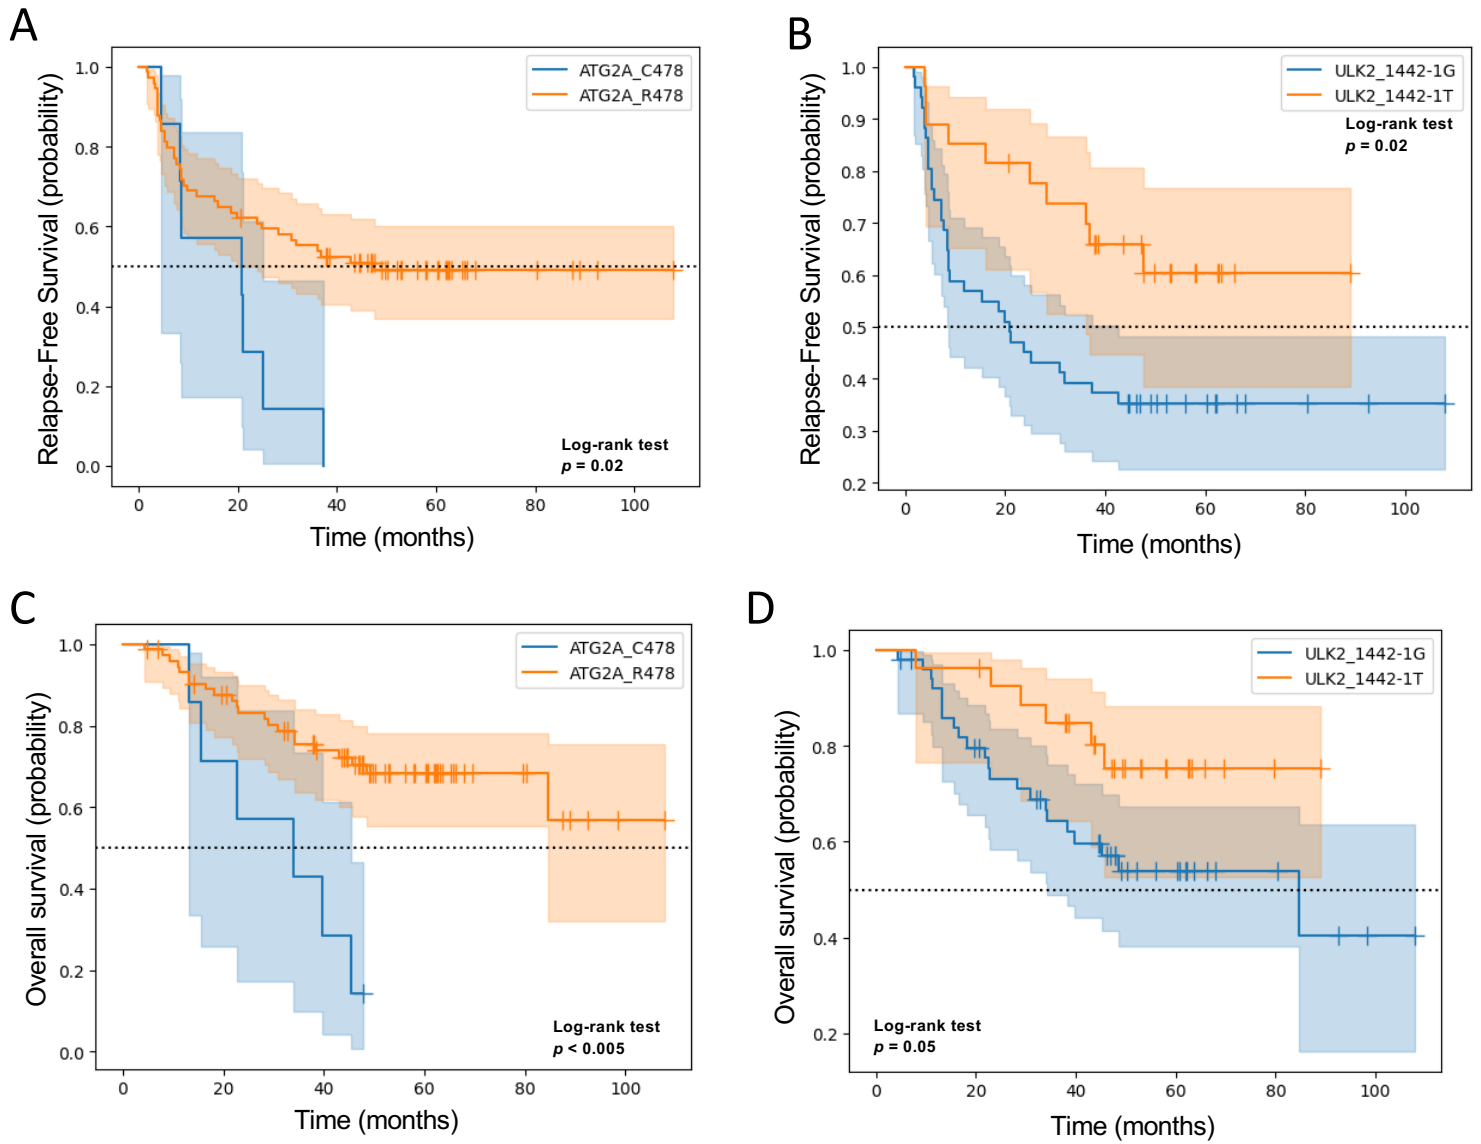

(Fig 16)

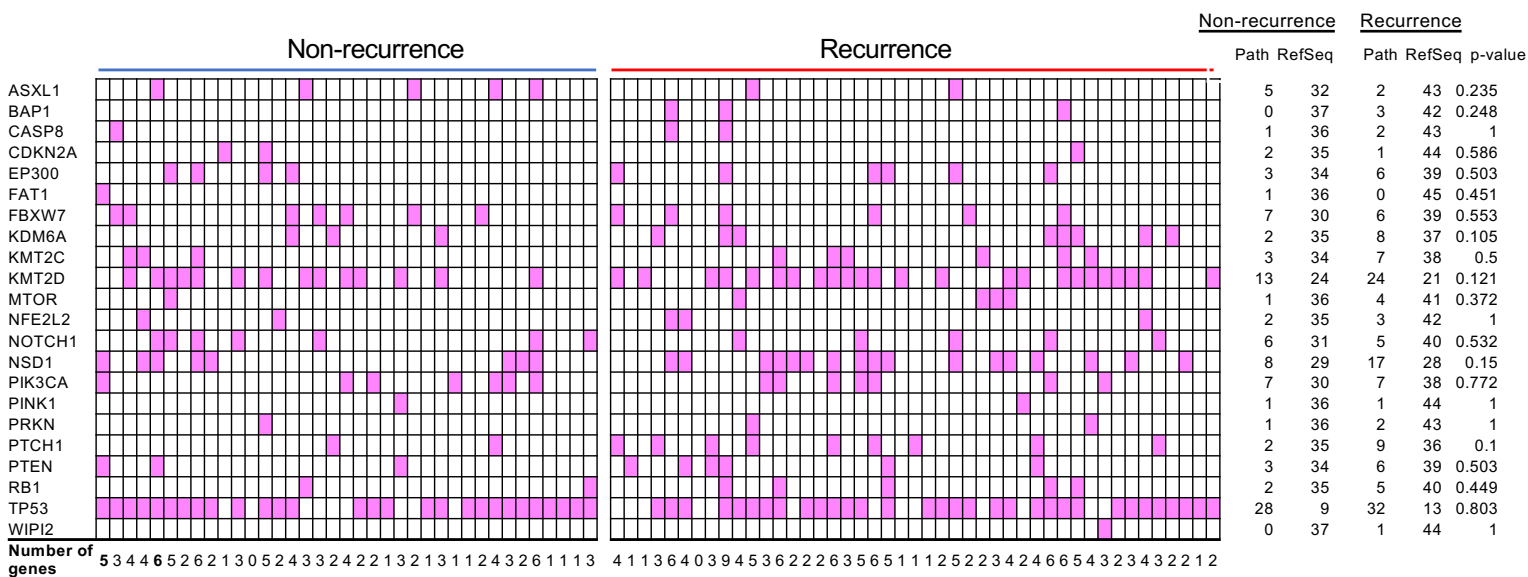



A

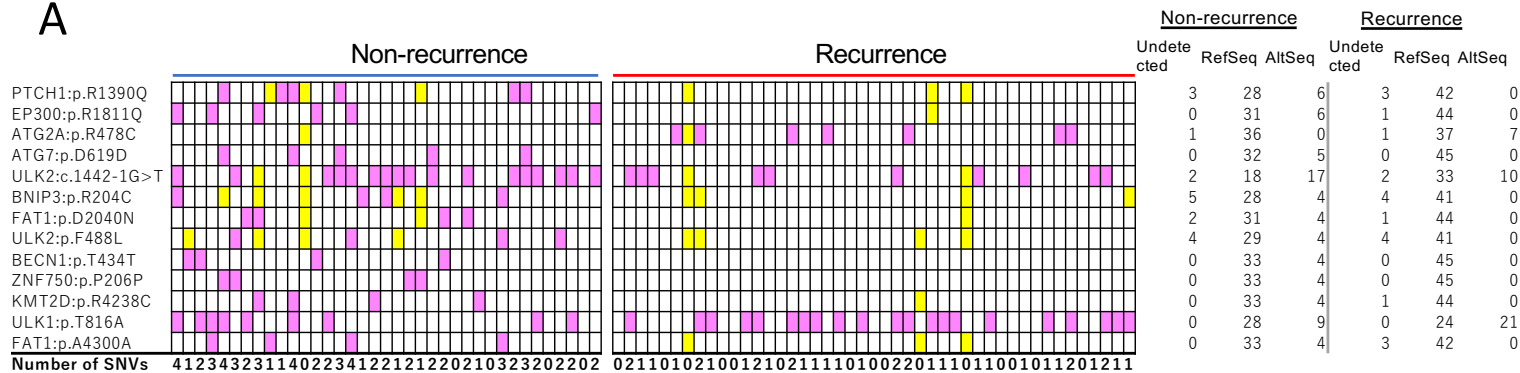

B

**Patient Background + SNVs**

**Patient Background**

1. Gender (Male=1)
2. Age
3. Neo-adjuvant course
4. Tumor location (Lt=1, MT=2, Ut=3)
5. Organization type (scc=1)
6. JES- cT
7. JES-cN
8. JES-cM

9. EP300\_R1811Q
10. PTCH1\_R1390Q
11. ATG2A\_R478C
12. ATG7\_D619D
13. ULK2\_1442-1G>T
14. BNIP3\_R204C
15. FAT1\_D2040N
16. ULK2\_F488L
17. ULK1\_T816A
18. BECN1\_T434T
19. ZNF750\_P206P
20. KMT2D\_R4238C
21. FAT1\_A4300A

(Fig 3)

medRxiv preprint doi: <https://doi.org/10.1101/2024.09.07.24313244>; this version posted September 9, 2024. The copyright holder for this preprint (which was not certified by peer review) is the author/funder, who has granted medRxiv a license to display the preprint in perpetuity. All rights reserved. No reuse allowed without permission.

A

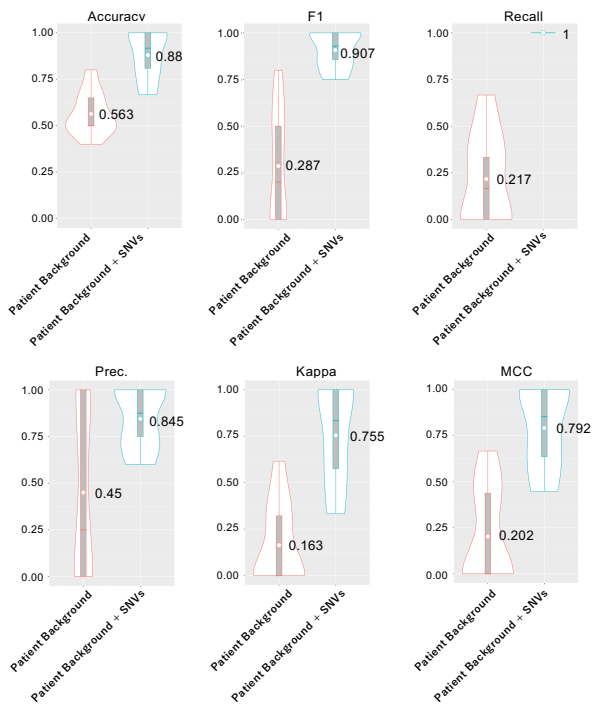

B

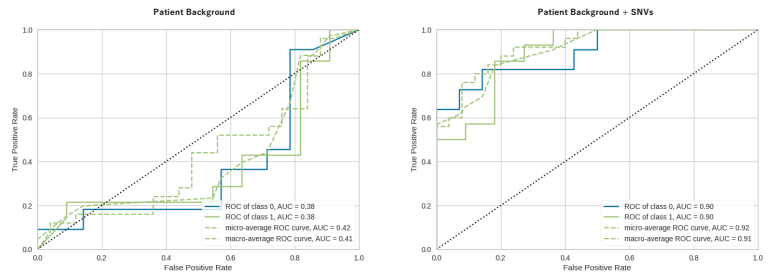

C

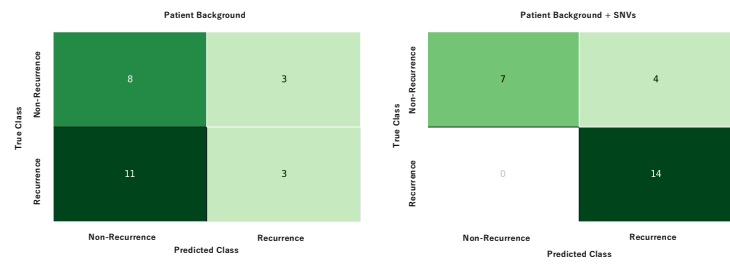

(Fig 4)

medRxiv preprint doi: <https://doi.org/10.1101/2024.09.07.24313244>; this version posted September 9, 2024. The copyright holder for this preprint (which was not certified by peer review) is the author/funder, who has granted medRxiv a license to display the preprint in perpetuity. All rights reserved. No reuse allowed without permission.

A

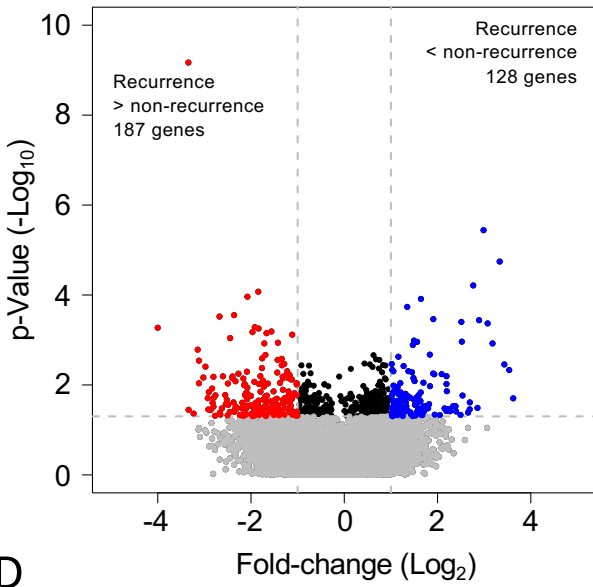

B

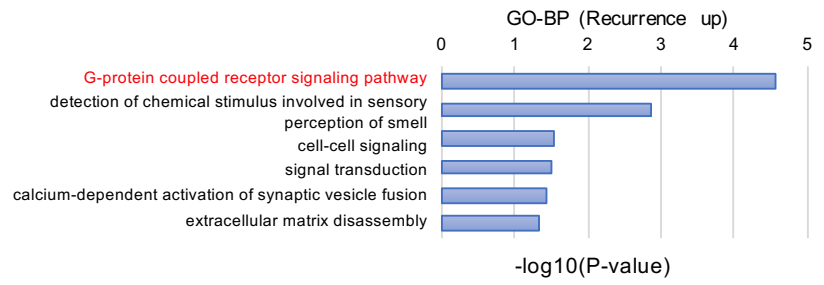

C

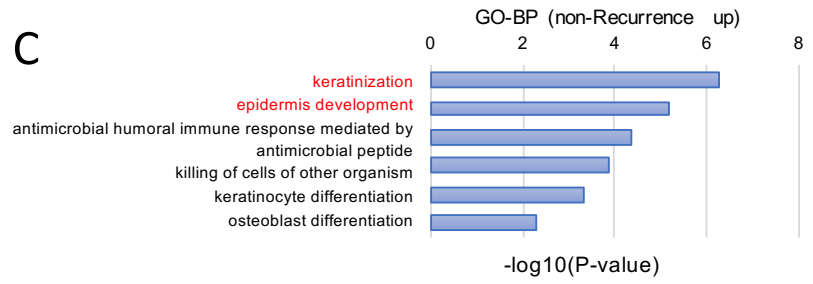

D

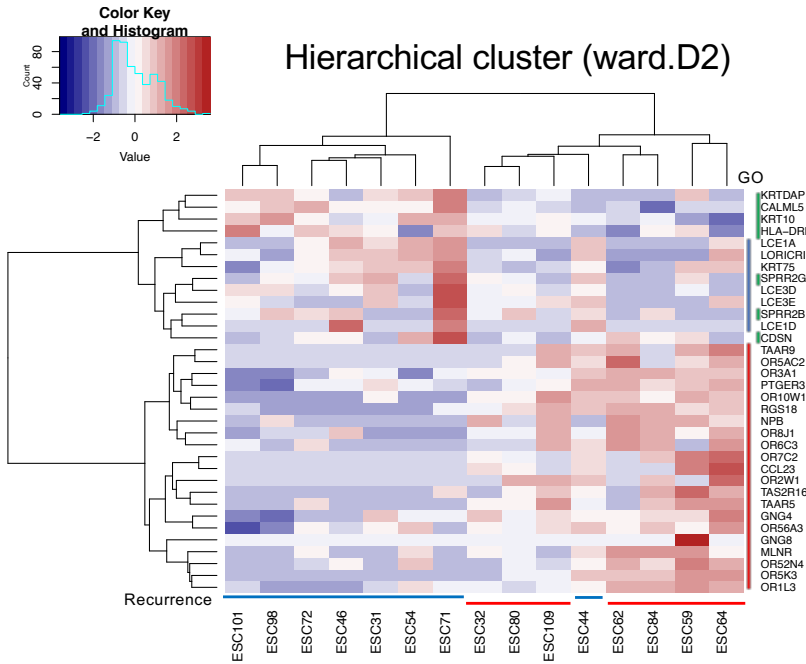

E

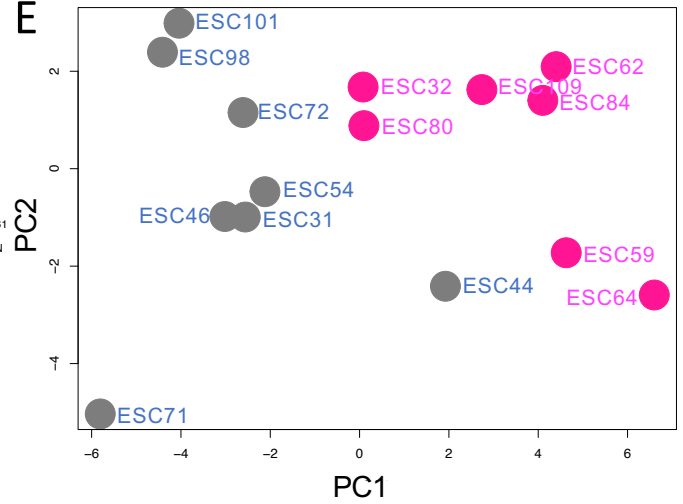

(Fig 3B)

A

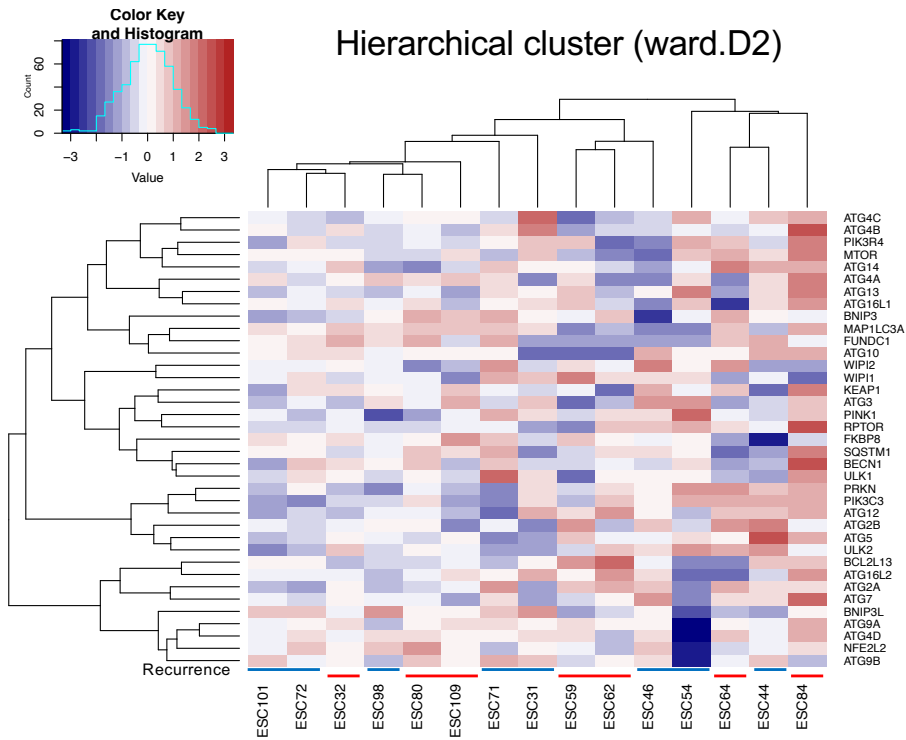

B

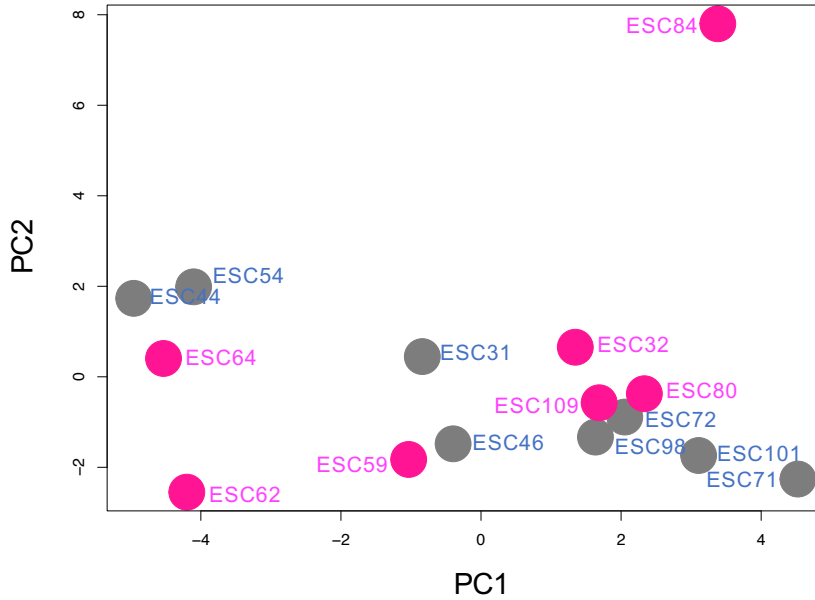

**Table 1. Clinical characteristics of the patients included in this study.**

**n=82**

|                                |                                       |
|--------------------------------|---------------------------------------|
| <b>Age years</b>               |                                       |
| Median (range)                 | 68 (51-80)                            |
| <b>Gender (%)</b>              |                                       |
| Male / Female                  | 74 (90%) / 8 (10%)                    |
| <b>Organization type (%)</b>   |                                       |
| Basaloid/SCC                   | 3 (4%) / 79 (96%)                     |
| <b>Neo-adjuvant course (%)</b> |                                       |
| 1 / 2                          | 11 (13%) / 71 (87%)                   |
| <b>Tumor location (%)</b>      |                                       |
| Upper / Middle / Lower         | 11 (13%) / 36 (43.5%) / 35 (43.5%)    |
| <b>cT category (%)</b>         |                                       |
| cT1 / T2 / T3                  | 1 (1%) / 3 (4%) / 78 (95%)            |
| <b>cN category (%)</b>         |                                       |
| cN0 / N1 / N2                  | 30 (37%) / 32 (39%) / 20 (24%)        |
| <b>cM category (%)</b>         |                                       |
| cM0 / M1                       | 79 (96%) / 3 (4%)                     |
| <b>cStage (%)</b>              |                                       |
| I / II / III/ IV               | 1 (1%) / 30 (37%) / 48 (58%) / 3 (4%) |
| <b>Recurrence (%)</b>          |                                       |
| non-recurrence / recurrence    | 37 (45%) / 45 (55%)                   |

| Gene symbol | Ensembl gene ID | Location (hg19)           | Region size (bp) | Coverage region (%) |
|-------------|-----------------|---------------------------|------------------|---------------------|
| AJUBA       | ENSG00000129474 | chr14:23442642-23451485   | 1901             | 100                 |
| ASXL1       | ENSG00000171456 | chr20:30946569-31026251   | 5137             | 100                 |
| ATG10       | ENSG00000152348 | chr5:81283380-81549254    | 1053             | 100                 |
| ATG12       | ENSG00000145782 | chr5:115167491-115177400  | 780              | 100                 |
| ATG13       | ENSG00000175224 | chr11:46665832-46693892   | 2026             | 99.95               |
| ATG14       | ENSG00000126775 | chr14:55836327-55878550   | 1679             | 100                 |
| ATG16L1     | ENSG00000085978 | chr2:234160464-234203006  | 2255             | 100                 |
| ATG16L2     | ENSG00000168010 | chr11:72525467-72540445   | 2617             | 100                 |
| ATG2A       | ENSG00000110046 | chr11:64662435-64684617   | 6643             | 99.91               |
| ATG2B       | ENSG00000066739 | chr14:96752082-96829323   | 7077             | 99.93               |
| ATG3        | ENSG00000144848 | chr3:112251536-112280385  | 1258             | 100                 |
| ATG4A       | ENSG00000101844 | chrX:107335047-107396952  | 1500             | 100                 |
| ATG4B       | ENSG00000168397 | chr2:242577120-242611689  | 1975             | 100                 |
| ATG4C       | ENSG00000125703 | chr1:63269448-63329840    | 1609             | 100                 |
| ATG4D       | ENSG00000130734 | chr19:10654757-10663753   | 1818             | 100                 |
| ATG5        | ENSG00000057663 | chr6:106494686-106764093  | 993              | 100                 |
| ATG7        | ENSG00000197548 | chr3:11340160-11605769    | 2734             | 100                 |
| ATG9A       | ENSG00000198925 | chr2:220085159-220092756  | 2802             | 100                 |
| ATG9B       | ENSG00000181652 | chr7:150712974-150721520  | 3116             | 100                 |
| BAP1        | ENSG00000163930 | chr3:52435679-52443904    | 3108             | 100                 |
| BCL2L13     | ENSG00000099968 | chr22:18121450-18210310   | 1903             | 99.47               |
| BECN1       | ENSG00000126581 | chr17:40962768-40975905   | 1888             | 92.85               |
| BNIP3       | ENSG00000176171 | chr10:133782018-133795515 | 904              | 100                 |
| BNIP3L      | ENSG00000104765 | chr8:26240637-26362845    | 813              | 100                 |
| CASP8       | ENSG00000064012 | chr2:202122945-202151327  | 2013             | 100                 |
| CDKN2A      | ENSG00000147889 | chr9:21968198-21994463    | 1248             | 100                 |
| EP300       | ENSG00000100393 | chr22:41488999-41574970   | 7865             | 99.91               |
| FAT1        | ENSG00000083857 | chr4:187509736-187630991  | 14602            | 99.88               |
| FBXW7       | ENSG00000109670 | chr4:153244023-153332965  | 2898             | 100                 |
| FKBP8       | ENSG00000105701 | chr19:18642969-18653769   | 1528             | 100                 |
| FUNDC1      | ENSG00000069509 | chrX:44383434-44402088    | 568              | 100                 |
| KDM6A       | ENSG00000147050 | chrX:44732788-44970666    | 5090             | 100                 |
| KEAP1       | ENSG00000079999 | chr19:10597318-10614244   | 2313             | 100                 |
| KMT2C       | ENSG00000055609 | chr7:151833907-152132881  | 16122            | 98.98               |
| KMT2D       | ENSG00000167548 | chr12:49415553-49449117   | 17762            | 99.04               |
| MAP1LC3A    | ENSG00000101460 | chr20:33137772-33147712   | 518              | 100                 |
| MTOR        | ENSG00000198793 | chr1:11167532-11319476    | 8790             | 100                 |
| NFE2L2      | ENSG00000116044 | chr2:178092624-178175743  | 2120             | 96.79               |
| NOTCH1      | ENSG00000148400 | chr9:139390513-139440248  | 8348             | 99.87               |
| NSD1        | ENSG00000165671 | chr5:176562095-176722470  | 8765             | 99.87               |
| PIK3C3      | ENSG00000078142 | chr18:39535247-39661111   | 3436             | 99.97               |
| PIK3CA      | ENSG00000121879 | chr3:178916604-178952162  | 3696             | 98.78               |
| PIK3R4      | ENSG00000196455 | chr3:130398149-130464072  | 4457             | 99.8                |
| PINK1       | ENSG00000158828 | chr1:20960032-20977194    | 1906             | 100                 |
| PRKN        | ENSG00000185345 | chr6:161771121-163148710  | 2355             | 98.22               |
| PTCH1       | ENSG00000185920 | chr9:98209184-98279112    | 5200             | 100                 |
| PTEN        | ENSG00000171862 | chr10:89623697-89725239   | 1912             | 100                 |
| RB1         | ENSG00000139687 | chr13:48878039-49054217   | 3414             | 99.21               |
| RPTOR       | ENSG00000141564 | chr17:78519420-78938140   | 5148             | 99.44               |
| SQSTM1      | ENSG00000161011 | chr5:179247927-179263667  | 1653             | 100                 |
| TP53        | ENSG00000141510 | chr17:7565247-7579922     | 1660             | 94.64               |
| ULK1        | ENSG00000177169 | chr12:132379537-132405916 | 3775             | 100                 |
| ULK2        | ENSG00000083290 | chr17:19679652-19770740   | 3858             | 100                 |
| WIPI1       | ENSG00000070540 | chr17:66417904-66453572   | 1626             | 99.75               |
| WIPI2       | ENSG00000157954 | chr7:5230041-5270588      | 1659             | 100                 |
| ZNF750      | ENSG00000141579 | chr17:80788008-80790340   | 2212             | 100                 |

Table 2. Results of target enrichment sequencing

| Gene symbol   | Exonic function    | Nucleotide change        | Aa change | <u>Non-recurrence</u> |            | <u>Recurrence</u> |            | p-value |
|---------------|--------------------|--------------------------|-----------|-----------------------|------------|-------------------|------------|---------|
|               |                    |                          |           | RefSeq (n)            | AltSeq (n) | RefSeq (n)        | AltSeq (n) |         |
| <i>EP300</i>  | non-synonymous SNV | NM_001362843:c.5432G>A   | p.R1811Q  | 31                    | 7          | 44                | 0          | 0.0072  |
| <i>PTCH1</i>  | non-synonymous SNV | NM_001354918:c.4169G>A   | p.R1390Q  | 29                    | 6          | 42                | 0          | 0.0062  |
| <i>ATG2A</i>  | non-synonymous SNV | NM_001367971:c.1432C>T   | p.R478C   | 37                    | 0          | 37                | 7          | 0.0147  |
| <i>ATG7</i>   | synonymous SNV     | NM_001144912:c.1857T>C   | p.D619D   | 33                    | 5          | 45                | 0          | 0.0160  |
| <i>ULK2</i>   | splicing           | NM_001142610:c.1442-1G>T | splicing  | 19                    | 17         | 33                | 10         | 0.0306  |
| <i>BNIP3</i>  | non-synonymous SNV | NM_004052:c.610C>T       | p.R204C   | 28                    | 4          | 41                | 0          | 0.0330  |
| <i>FAT1</i>   | non-synonymous SNV | NM_005245:c.6118G>A      | p.D2040N  | 32                    | 4          | 44                | 0          | 0.0348  |
| <i>ULK2</i>   | non-synonymous SNV | NM_001142610:c.1464C>A   | p.F488L   | 30                    | 4          | 41                | 0          | 0.0356  |
| <i>ULK1</i>   | non-synonymous SNV | NM_003565:c.2446A>G      | p.T816A   | 29                    | 9          | 24                | 21         | 0.0416  |
| <i>BECN1</i>  | synonymous SNV     | NM_001313998:c.1302G>A   | p.T434T   | 34                    | 4          | 45                | 0          | 0.0378  |
| <i>ZNF750</i> | synonymous SNV     | NM_024702:c.618C>T       | p.P206P   | 34                    | 4          | 45                | 0          | 0.0378  |
| <i>KMT2D</i>  | non-synonymous SNV | NM_003482:c.12712C>T     | p.R4238C  | 34                    | 4          | 44                | 0          | 0.0397  |
| <i>FAT1</i>   | synonymous SNV     | NM_005245:c.12900G>A     | p.A4300A  | 34                    | 4          | 42                | 0          | 0.0440  |

Eighty-four patients were included in the analysis; Fisher's exact test of 560 SNVs or INDELS showed 5 SNVs with  $p < 0.05$ .

Aa change: amino acid change, RefSeq: allele in the reference genome, AltSeq: Alt, any other allele found at that locus.

| Gene symbol   | Nucleotide change        | Aa change | OS               | RFS         |
|---------------|--------------------------|-----------|------------------|-------------|
| <i>EP300</i>  | NM_001362843:c.5432G>A   | p.R1811Q  | 0.06             | <b>0.02</b> |
| <i>PTCH1</i>  | NM_001354918:c.4169G>A   | p.R1390Q  | 0.1              | <b>0.02</b> |
| <i>ATG2A</i>  | NM_001367971:c.1432C>T   | p.R478C   | <b>&lt;0.005</b> | <b>0.02</b> |
| <i>ATG7</i>   | NM_001144912:c.1857T>C   | p.D619D   | 0.14             | <b>0.04</b> |
| <i>ULK2</i>   | NM_001142610:c.1442-1G>T | splicing  | <b>0.05</b>      | <b>0.02</b> |
| <i>BNIP3</i>  | NM_004052:c.610C>T       | p.R204C   | 0.18             | 0.07        |
| <i>FAT1</i>   | NM_005245:c.6118G>A      | p.D2040N  | 0.14             | 0.06        |
| <i>ULK2</i>   | NM_001142610:c.1464C>A   | p.F488L   | 0.16             | 0.06        |
| <i>ULK1</i>   | NM_003565:c.2446A>G      | p.T816A   | 0.08             | 0.06        |
| <i>BECN1</i>  | NM_001313998:c.1302G>A   | p.T434T   | 0.14             | 0.06        |
| <i>ZNF750</i> | NM_024702:c.618C>T       | p.P206P   | 0.16             | 0.06        |
| <i>KMT2D</i>  | NM_003482:c.12712C>T     | p.R4238C  | 0.15             | 0.06        |
| <i>FAT1</i>   | NM_005245:c.12900G>A     | p.A4300A  | 0.15             | 0.07        |



Table 3. Univariate and multivariate Cox regression analysis for RFS.

| Factor                                                                               | Category                                                                                           | Univariate     |        |             | Multivariate   |       |             |
|--------------------------------------------------------------------------------------|----------------------------------------------------------------------------------------------------|----------------|--------|-------------|----------------|-------|-------------|
|                                                                                      |                                                                                                    | <i>p</i> value | HR     | 95% CI      | <i>p</i> value | HR    | 95% CI      |
| Age                                                                                  | ≥70 (vs. <70 )                                                                                     | 0.216          | 0.679  | 0.365-1.261 |                |       |             |
| Sex                                                                                  | female (vs. Male)                                                                                  | 0.788          | 0.880  | 0.364-2.240 |                |       |             |
| ASA-PS                                                                               | 2 or 3 (vs. 0 or 1)                                                                                | 0.619          | 1.205  | 0.577-2.518 |                |       |             |
| Body Mass Index                                                                      | ≥18.5 (vs. <18.5)                                                                                  | 0.889          | 1.051  | 0.518-2.134 |                |       |             |
| Tumor location                                                                       | Mt or Lt (vs. Ut)                                                                                  | 0.196          | 1.697  | 0.752-3.825 |                |       |             |
| clinical tumor depth                                                                 | cT3 (vs. T1-2)                                                                                     | 0.150          | 0.477  | 0.170-1.341 |                |       |             |
| clinical lymph node metastasis                                                       | presence (vs. absence)                                                                             | 0.297          | 1.412  | 0.735-2.710 | 0.317          | 1.414 | 0.717-2.785 |
| clinical distant metastasis<br>(Supravlavian Lymph node metastases)                  | presence (vs. absence)                                                                             | 0.705          | 1.314  | 0.317-5.450 |                |       |             |
| Thoracic approach                                                                    | OT (vs. MIE)                                                                                       | 0.005*         | 2.315  | 1.266-4.237 | 0.018*         | 2.096 | 1.138-3.861 |
| variant in ATG2A_R478C                                                               | presence (vs. absence)                                                                             | 0.025*         | 2.469  | 1.085-5.617 |                |       |             |
| variant in ULK2_1442-2G>T                                                            | absence (vs. presence)                                                                             | 0.016*         | 2.,331 | 1.147-4.739 |                |       |             |
| Either presence of variant in ATG2A_R478C<br>or absence of variant in ULK2_1442-2G>T | (vs. Both of absence of<br>variant in ATG2A_R478C<br>and presence of variant in<br>ULK2_1442-2G>T) | 0.016*         | 2.331  | 1.146-4.470 | 0.046*         | 2.076 | 1.013-4.255 |

HR: hazard ratio, CI: confidence interval, Ut: Upper thoracic, Mt: Middle thoracic, Lt: Lower thoracic, OT: Open thoracotomy, MIE: minimally invasive esophagectomy,  
\*:  $p < 0.05$ ,

Table 4. Univariate and multivariate Cox regression analysis for OS.

| Factor                                                                               | Category                                                                                           | Univariate     |       |             | Multivariate   |       |             |
|--------------------------------------------------------------------------------------|----------------------------------------------------------------------------------------------------|----------------|-------|-------------|----------------|-------|-------------|
|                                                                                      |                                                                                                    | <i>p</i> value | HR    | 95% CI      | <i>p</i> value | HR    | 95% CI      |
| Age                                                                                  | ≥70 (vs. <70 )                                                                                     | 0.394          | 0.716 | 0.330-1.551 |                |       |             |
| Sex                                                                                  | female (vs. Male)                                                                                  | 0.834          | 0.880 | 0.264-2.927 |                |       |             |
| ASA-PS                                                                               | 2 or 3 (vs. 0 or 1)                                                                                | 0.302          | 1.651 | 0.636-4.284 |                |       |             |
| Body Mass Index                                                                      | ≥18.5 (vs. <18.5)                                                                                  | 0.721          | 0.856 | 0.364-2.014 |                |       |             |
| Tumor location                                                                       | Mt or Lt (vs. Ut)                                                                                  | 0.694          | 1.237 | 0.428-3.579 |                |       |             |
| clinical tumor depth                                                                 | cT3 (vs. T1-2)                                                                                     | 0.862          | 1.194 | 0.162-8.819 |                |       |             |
| clinical lymph node metastasis                                                       | presence (vs. absence)                                                                             | 0.077          | 2.210 | 0.896-5.451 | 0.040*         | 2.604 | 1.047-6.476 |
| clinical distant meastasis<br>(Supravlavian Lymph node metastases)                   | presence (vs. absence)                                                                             | 0.651          | 1.396 | 0.326-5.969 |                |       |             |
| Thoracic apprach                                                                     | OT (vs. MIE)                                                                                       | 0.050          | 2.119 | 0.983-4.566 | 0.212          | 1.650 | 0.751-3.623 |
| variant in ATG2A_R478C                                                               | presence (vs. absence)                                                                             | 0.002*         | 3.741 | 1.494-9.366 |                |       |             |
| variant in ULK2_1442-2G>T                                                            | absence (vs. presence)                                                                             | 0.054          | 2.370 | 0.959-5.848 |                |       |             |
| Either presence of variant in ATG2A_R478C<br>or absence of variant in ULK2_1442-2G>T | (vs. Both of absence of<br>variant in ATG2A_R478C<br>and presence of variant in<br>ULK2_1442-2G>T) | 0.054          | 2.371 | 0.959-5.860 | 0.029*         | 2.764 | 1.109-6.890 |

HR: hazard ratio, CI: confidence interval, Ut: Upper thoracic, Mt: Middle thoracic, Lt: Lower thoracic, OT: Open thoracotomy, MIE: minimally invasive esophagectomy,  
 \*· *p*<0.05

**Table S3. Results of the Pycaret classification module when Patient Background + SNVs is the feature and recurrence is the correct answer.**

|                 | <b>Model</b>   | <b>Accuracy</b> | <b>AUC</b> | <b>Recall</b> | <b>Prec.</b> | <b>F1</b> | <b>Kappa</b> | <b>MCC</b> | <b>TT (Sec)</b> |
|-----------------|----------------|-----------------|------------|---------------|--------------|-----------|--------------|------------|-----------------|
| <b>nb</b>       | Naive Bayes    | 0.8467          | -          | 0.9417        | 0.845        | 0.8729    | 0.6879       | 0.7335     | 0.061           |
| <b>et</b>       | Extra Trees C  | 0.75            | -          | 0.8083        | 0.695        | 0.7364    | 0.4763       | 0.4945     | 0.242           |
| <b>lda</b>      | Linear Discrir | 0.6833          | 0.7097     | 0.8667        | 0.6617       | 0.7384    | 0.3208       | 0.3606     | 0.038           |
| <b>ridge</b>    | Ridge Classif  | 0.68            | 0.7764     | 0.8417        | 0.6733       | 0.734     | 0.325        | 0.3632     | 0.036           |
| <b>gbc</b>      | Gradient Boo   | 0.6667          | 0.6903     | 0.7583        | 0.6617       | 0.6605    | 0.3297       | 0.3718     | 0.119           |
| <b>dt</b>       | Decision Tree  | 0.66            | -          | 0.7417        | 0.6433       | 0.6721    | 0.3013       | 0.3007     | 0.046           |
| <b>ada</b>      | Ada Boost Cl   | 0.66            | 0.7139     | 0.6917        | 0.7783       | 0.6762    | 0.3131       | 0.3625     | 0.115           |
| <b>lr</b>       | Logistic Regr  | 0.6467          | 0.7208     | 0.75          | 0.645        | 0.6662    | 0.2883       | 0.3079     | 0.552           |
| <b>rf</b>       | Random Fore    | 0.6467          | -          | 0.775         | 0.605        | 0.6581    | 0.2712       | 0.3059     | 0.224           |
| <b>xgboost</b>  | Extreme Grac   | 0.6333          | -          | 0.7083        | 0.6367       | 0.6324    | 0.2651       | 0.3093     | 0.078           |
| <b>qda</b>      | Quadratic Dis  | 0.5467          | -          | 1             | 0.5467       | 0.705     | 0            | 0          | 0.035           |
| <b>dummy</b>    | Dummy Class    | 0.5467          | -          | 1             | 0.5467       | 0.705     | 0            | 0          | 0.032           |
| <b>lightgbm</b> | Light Gradier  | 0.54            | -          | 0.65          | 0.5733       | 0.599     | 0.0483       | 0.0392     | 0.205           |
| <b>knn</b>      | K Neighbors    | 0.5067          | -          | 0.5583        | 0.5983       | 0.5362    | 0.0235       | 0.0217     | 0.064           |
| <b>svm</b>      | SVM - Linear   | 0.4933          | 0.3694     | 0.5           | 0.3617       | 0.4052    | -0.0667      | -0.0707    | 0.037           |
